# Supplementary material
Source: PubMed Central journal article supplement (PMC1937554)
Supplement: pnas_0701466104_7.pdf [file pnas_0701466104_7.pdf]

**Table 1. Sequences for primers and probes, normal concentrations used were 250 nM for probes and 400 nM for the primers**

| Gene name        | forward primer 5' - 3'    | probe 5'-FAM - 3' -TAMRA        | reverse primer 5' - 3'  |
|------------------|---------------------------|---------------------------------|-------------------------|
| <i>dbp</i>       | GCGAGAAGTGCAAAATTGGC      | CGCGCGCCTGTGTCCCTTG             | CGGGAGGCTCCTATAGTCTGG   |
| <i>hlf</i>       | CGCCAGGAGGTGGCTG          | TTTAAGGAAGGAGCTGGGCAAATGCAA     | GCCTCGTACTTGGCAAGTATGTT |
| <i>rev-erb a</i> | ACAGCAGCCGAGTGTCCC        | CAGCAAGGGCACAAGCAACATTACCAAG    | ACACAGTAGCACCATGCCATT   |
| <i>bmal1</i>     | CCAAGAAAGTATGGACACAGACAAA | TGACCCTCATGGAAGGTTAGAATATGCAGAA | GCATTCTTGATCCTTCCTTGGT  |
| <i>clock</i>     | TTGCTCCACGGGAATCCTT       | ACACAGCTCATCCTCTCTGCTGCCTTC     | GGAGGGAAAGTGCTCTGTTGTAG |

| pre-developed taqman assays (Applied Biosystems) |               |
|--------------------------------------------------|---------------|
| <i>18s rRNA</i>                                  | 4310893E      |
| <i>Per1</i>                                      | Mm00501813_m1 |
| <i>Per2</i>                                      | Mm00478113_m1 |
| <i>Per3</i>                                      | Mm00478120_m1 |
| <i>Tef</i>                                       | Mm00457513_m1 |
