# Supplementary material
Source: PubMed Central journal article supplement (PMC1937554)

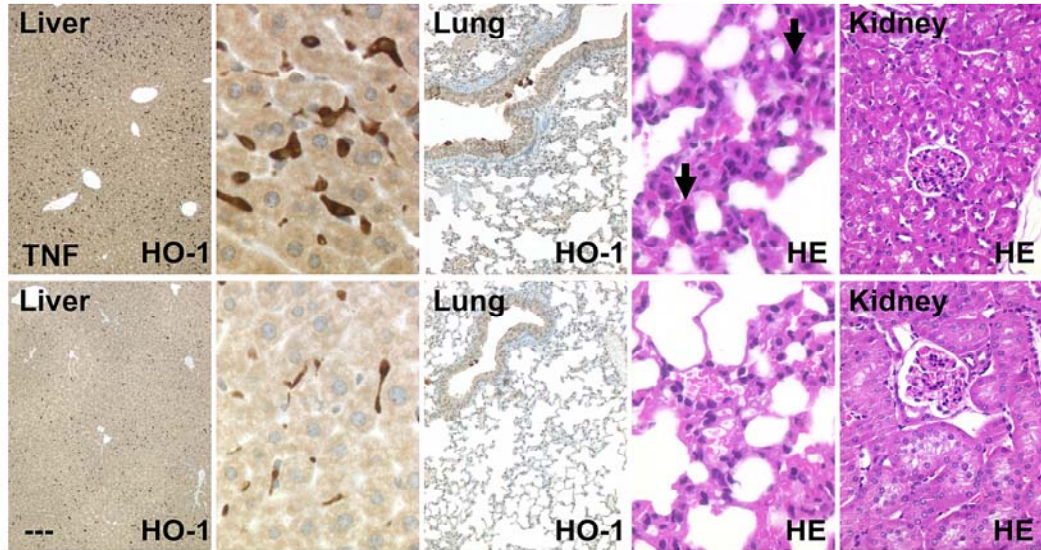

Supplement: pnas_0701466104_1.pdf [file pnas_0701466104_1.pdf]

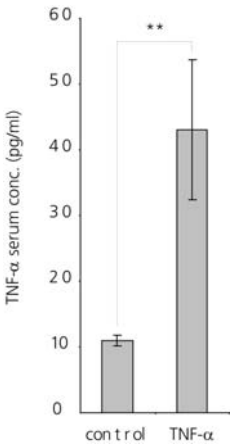

Supplement: pnas_0701466104_2.pdf [file pnas_0701466104_2.pdf]

ZT15.5

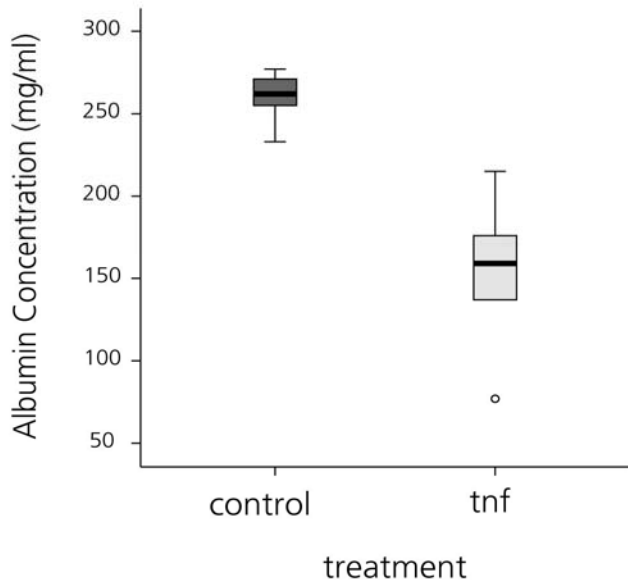

Supplement: pnas_0701466104_3.pdf [file pnas_0701466104_3.pdf]

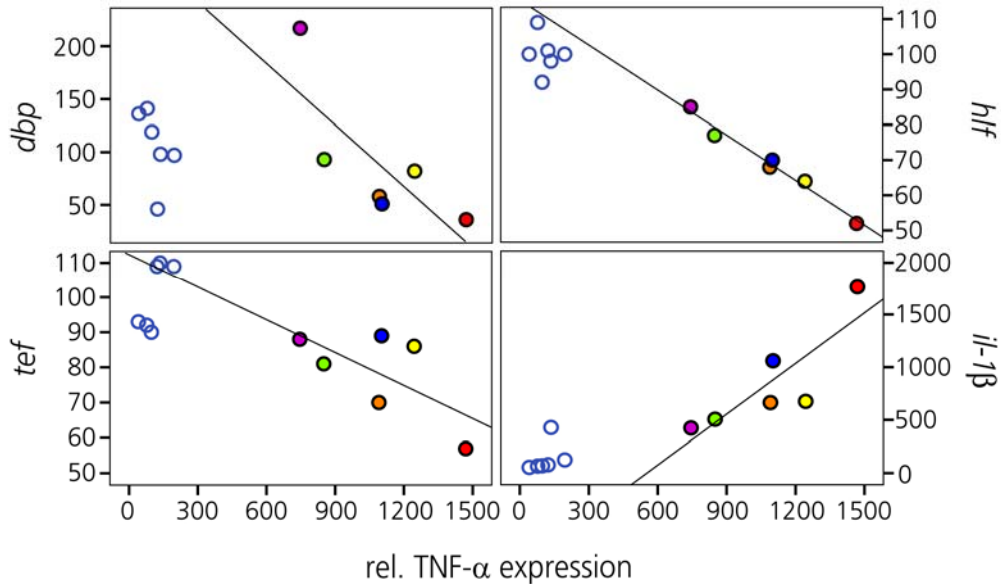

Supplement: pnas_0701466104_4.pdf [file pnas_0701466104_4.pdf]

**A****Mock****TNF- $\alpha$** *Dbp*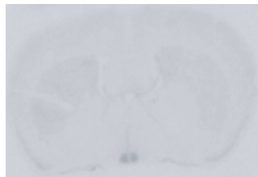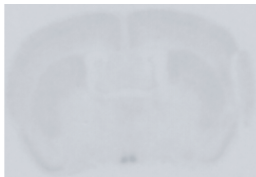*Bmal1*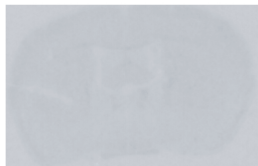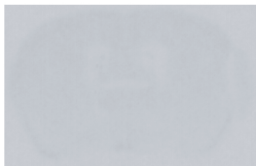**B**

rel. RNA abundance (%)

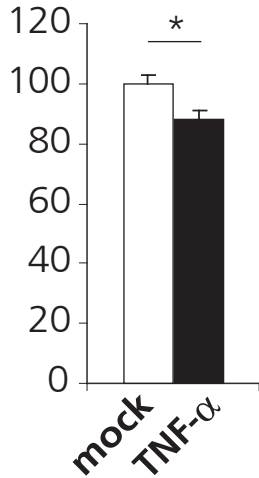

Supplement: pnas_0701466104_5.pdf [file pnas_0701466104_5.pdf]

**A**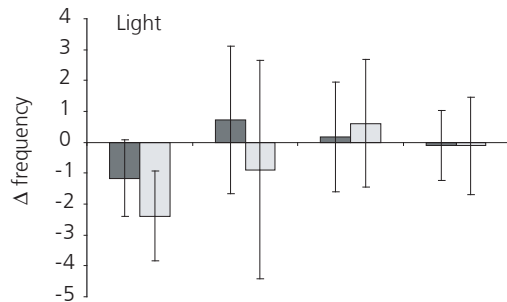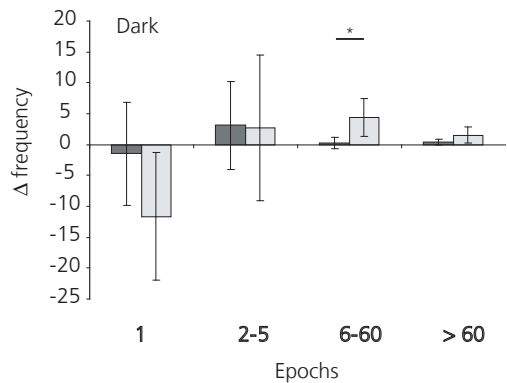**B**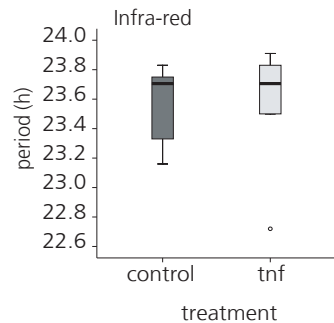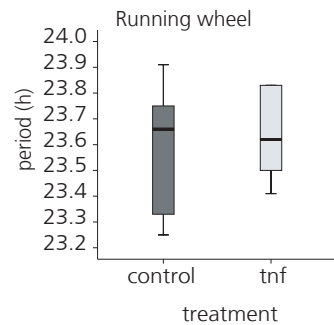

Supplement: pnas_0701466104_6.pdf [file pnas_0701466104_6.pdf]
